# Supplementary material for: Precision Engineering of Chondrocyte Microenvironments: Investigating the Optimal Reaction Conditions for Type B Gelatin Methacrylate Hydrogel Matrix for TC28a2 Cells
Source: MDPI journal article supplement (doi:10.3390/jfb15030077), 2024-03-20
Supplement: s1 [file s1]

*Supplementary Materials*

# Precision Engineering of Chondrocyte Microenvironments: Investigating the Optimal Reaction Conditions for Type B Gelatin Methacrylate Hydrogel Matrix for TC28a2 Cells

Qichan Hu <sup>1</sup>, Marc A. Torres <sup>1</sup>, Hongjun Pan <sup>2</sup>, Steven L. Williams <sup>3</sup> and Melanie Ecker <sup>1,\*</sup>

<sup>1</sup> Department of Biomedical Engineering, University of North Texas, Denton, TX 76203, USA; qichanhu@my.unt.edu (Q.H.); marctorres@my.unt.edu (M.A.T.)

<sup>2</sup> Department of Chemistry, University of North Texas, Denton, TX 76203, USA; hongjun.pan@unt.edu

<sup>3</sup> Department of Biological Sciences, University of North Texas, Denton, TX 76203, USA; stevenwilliams5@my.unt.edu

\* Correspondence: melanie.ecker@unt.edu

**Citation:** Hu, Q.; Torres, M.A.; Pan, H.; Williams, S.L.; Ecker, M.

Precision Engineering of Chondrocyte Microenvironments: Investigating the Optimal Reaction Conditions for Type B Gelatin Methacrylate Hydrogel Matrix for TC28a2 Cells. *J. Funct. Biomater.* **2024**, *15*, 77.

<https://doi.org/10.3390/jfb15030077>

Academic Editor: Zhen Zheng

Received: 21 February 2024

Revised: 15 March 2024

Accepted: 16 March 2024

Published: 20 March 2024

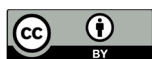

**Copyright:** © 2024 by the authors. Licensee MDPI, Basel, Switzerland. This article is an open access article distributed under the terms and conditions of the Creative Commons Attribution (CC BY) license (<https://creativecommons.org/licenses/by/4.0/>).

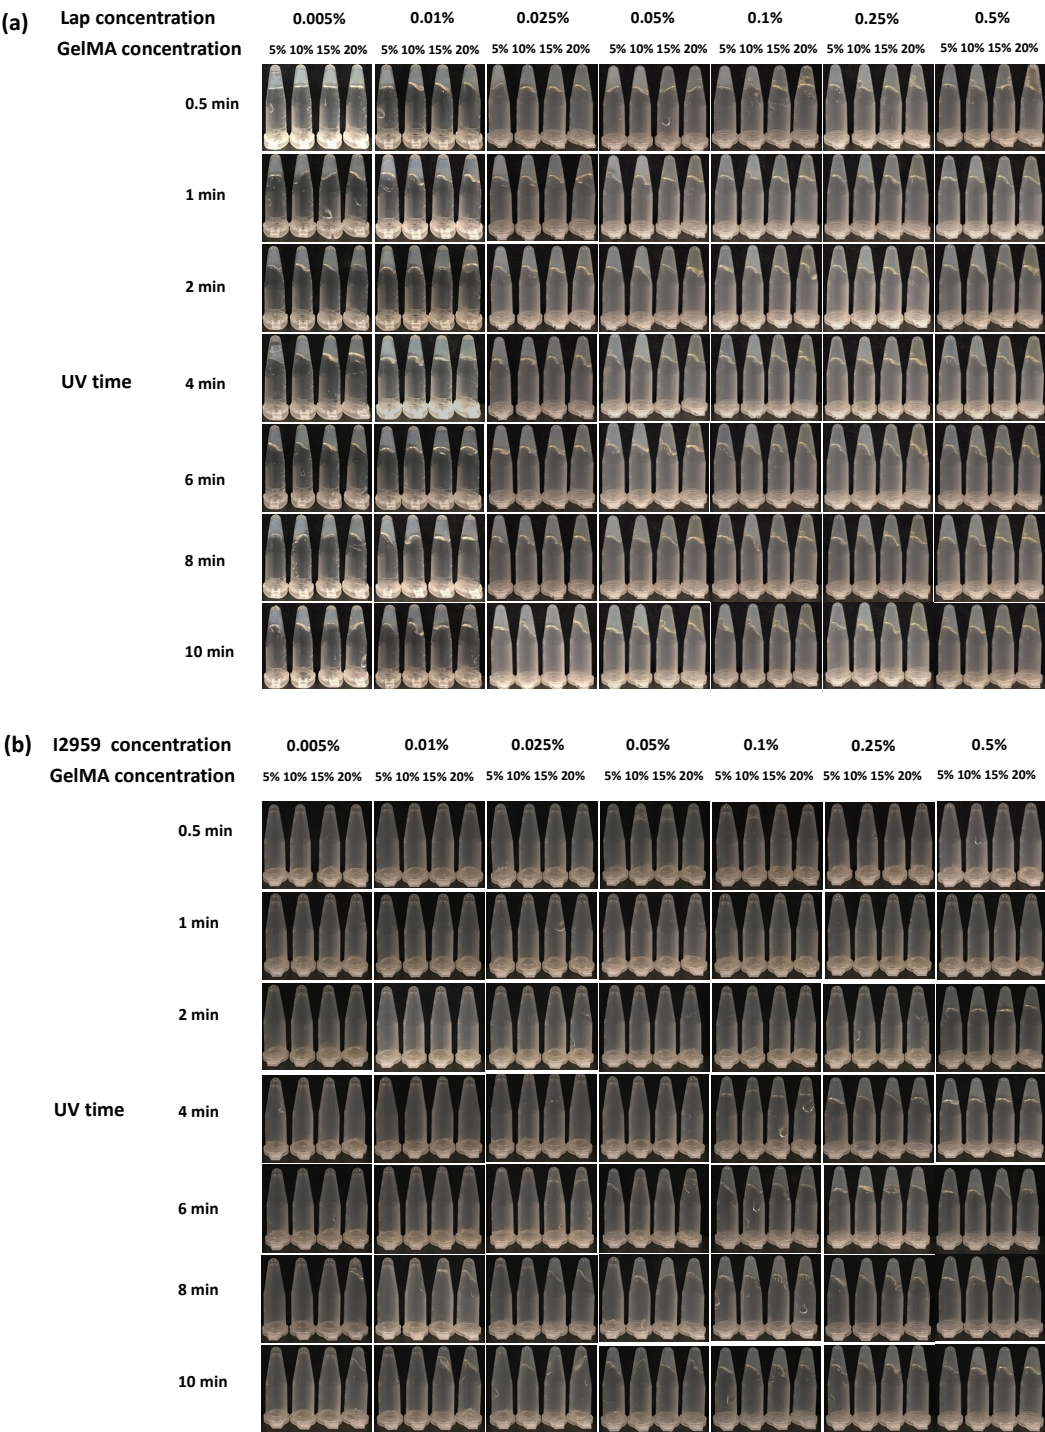

**Figure S1.** Gelation of GelMA precursor across various conditions with (a) photoinitiator LAP and (b) photoinitiator Irgacure 2959.

**Table S1.** Tissue processing steps for paraffin sections.

| Step            | Time (h) | Temperature (°C) |
|-----------------|----------|------------------|
| 4% PFA Fixation | 24       | 20-22            |
| 70% EtOH        | 1        | 20-22            |
| 80% EtOH        | 0.75     | 20-22            |
| 95% EtOH        | 0.75     | 20-22            |
| 95% EtOH        | 1        | 20-22            |
| 100% EtOH       | 1        | 20-22            |

|            |   |       |
|------------|---|-------|
| 100% EtOH  | 1 | 20-22 |
| 100% EtOH  | 1 | 20-22 |
| Xylene     | 1 | 20-22 |
| Xylene     | 1 | 20-22 |
| Xylene     | 1 | 20-22 |
| Paraplast® | 2 | 56    |
| Paraplast® | 1 | 56    |
| Paraplast® | 1 | 56    |

**Table S2.** H&E staining steps.

| Step                         | Time (min) | Frequency |
|------------------------------|------------|-----------|
| Xylene                       | 3          | 3 X       |
| 100% EtOH                    | 3          | 3 X       |
| 95% EtOH                     | 3          | 1 X       |
| 80% EtOH                     | 3          | 1 X       |
| diH <sub>2</sub> O           | 5          | 1 X       |
| Hematoxylin Solution         | 3          | 1 X       |
| diH <sub>2</sub> O           | 2          | 1 X       |
| Running Tap H <sub>2</sub> O | 5          | 1 X       |
| diH <sub>2</sub> O Rinse     | 2          | 1 X       |
| Eosin Solution               | 2          | 1 X       |
| 95% EtOH                     | 3          | 3 X       |
| 100% EtOH                    | 3          | 3 X       |
| Xylene                       | 15         | 3 X       |

**Disclaimer/Publisher's Note:** The statements, opinions and data contained in all publications are solely those of the individual author(s) and contributor(s) and not of MDPI and/or the editor(s). MDPI and/or the editor(s) disclaim responsibility for any injury to people or property resulting from any ideas, methods, instructions or products referred to in the content.
